# Supplementary material
Source: PubMed Central journal article supplement (PMC6939590)
Supplement: Supp_Table1.pdf [file Supp_Table1.pdf]

SUPPLEMENTARY TABLE S1. GENE AND MOLECULAR FACTOR NAMES AND ABBREVIATIONS

| <i>Abbreviation</i> | <i>Common gene names</i>                                   |
|---------------------|------------------------------------------------------------|
| <i>ABCB1</i>        | ATP binding cassette subfamily B member 1                  |
| <i>ABCC1</i>        | ATP binding cassette subfamily C member 1                  |
| <i>ACE</i>          | Angiotensin-converting enzyme                              |
| <i>ACTG1</i>        | Actin gamma 1                                              |
| <i>ADIPOQ</i>       | Adiponectin C1Q and collagen domain containing             |
| <i>AGER</i>         | Advanced glycosylation end-product specific receptor       |
| <i>AHR</i>          | Aryl hydrocarbon receptor                                  |
| <i>AHSG</i>         | Alpha 2-HS glycoprotein                                    |
| <i>AKT</i>          | Serine/threonine kinase                                    |
| <i>ANG1</i>         | Angiogenin-1                                               |
| <i>ANG2</i>         | Angiogenin-2                                               |
| <i>ANXA1</i>        | Annexin A1                                                 |
| <i>ANXA2</i>        | Annexin A2                                                 |
| <i>AP-1</i>         | Activating protein-1                                       |
| <i>APOA1</i>        | Apolipoprotein A1                                          |
| <i>ARE</i>          | Antioxidant response elements                              |
| <i>AREG</i>         | Amphiregulin                                               |
| <i>ARG1</i>         | Arginase 1                                                 |
| <i>ARSD</i>         | Arylsulfatase D                                            |
| <i>BAD</i>          | BCL2-associated agonist of cell death                      |
| <i>BPI</i>          | Bactericidal permeability increasing protein               |
| <i>C3</i>           | Complement C3 precursor                                    |
| <i>C9</i>           | Complement C9 precursor                                    |
| <i>CAP1</i>         | Cyclase-associated actin cytoskeleton regulatory protein 1 |
| <i>CAT</i>          | Catalase                                                   |
| <i>CCL2</i>         | C-C motif chemokine ligand 2                               |
| <i>CCR2</i>         | C-C motif chemokine receptor 2                             |
| <i>CCT7</i>         | Chaperonin-containing TCP1 subunit 7                       |
| <i>CCT8</i>         | Chaperonin-containing TCP1 subunit 8                       |
| <i>CD24</i>         | CD24 surface antigen                                       |
| <i>CD36</i>         | CD36 surface antigen                                       |
| <i>CDKN1A</i>       | Cyclin-dependent kinase inhibitor 1A                       |
| <i>CEACAM1</i>      | Carcinoembryonic antigen-related cell adhesion molecule 1  |
| <i>CEACAM8</i>      | Carcinoembryonic antigen-related cell adhesion molecule 8  |
| <i>CEBPD</i>        | CCAAT enhancer binding protein delta                       |
| <i>CHIT1</i>        | Chitinase 1                                                |
| <i>COTL1</i>        | Coactosin-like F-actin binding protein 1                   |
| <i>CSDE1</i>        | Cold shock domain containing E1                            |
| <i>CSF2</i>         | Colony stimulating factor 2                                |
| <i>CSF2RB</i>       | Colony stimulating factor 2 receptor beta common subunit   |
| <i>CXCL2</i>        | C-X-C motif chemokine ligand 2                             |
| <i>CXCL8</i>        | C-X-C motif chemokine ligand 8                             |
| <i>CYBA</i>         | P22phox                                                    |
| <i>CYP1A1</i>       | Cytochrome P450 family 1 subfamily A member 1              |
| <i>DEFA4</i>        | Defensin alpha 4                                           |
| <i>DIO2</i>         | Iodothyronine deiodinase 2                                 |
| <i>DNAJA3</i>       | DNAJ heat shock protein family (HSP40) member A3           |
| <i>DNAJB6</i>       | DNAJ heat shock protein family (HSP40) member B6           |
| <i>DNAJB9</i>       | DNAJ heat shock protein family (HSP40) member B9           |
| <i>DNAJB11</i>      | DNAJ heat shock protein family (HSP40) member B11          |
| <i>DNAJC5</i>       | DNAJ heat shock protein family (HSP40) member C5           |
| <i>DNAJC8</i>       | DNAJ heat shock protein family (HSP40) member C8           |
| <i>EGFR</i>         | Epidermal growth factor receptor                           |
| <i>eNAMPT</i>       | Extracellular nicotinamide phosphoribosyl transferase      |
| <i>FAAH</i>         | Fatty acid amide hydrolase                                 |
| <i>FABP5</i>        | Fatty acid binding protein 5                               |
| <i>FER</i>          | Malectin-like receptor kinase FERONIA                      |
| <i>FGA</i>          | Fibrinogen alpha chain                                     |
| <i>FLK2</i>         | FMS-related tyrosine kinase 3                              |
| <i>FTH1</i>         | Ferritin heavy chain 1                                     |
| <i>FTL</i>          | Ferritin light chain                                       |
| <i>GADD45a</i>      | Growth arrest and DNA damage-inducible gene                |
| <i>GCLM</i>         | Glutamate-cysteine ligase modifier subunit                 |

(continued)

SUPPLEMENTARY TABLE S1. (CONTINUED)

| <i>Abbreviation</i> | <i>Common gene names</i>                               |
|---------------------|--------------------------------------------------------|
| <i>GPI</i>          | Glucose-6-phosphate isomerase                          |
| <i>GSR</i>          | Glutathione-disulfide reductase                        |
| <i>GSTP1</i>        | Glutathione S-transferase pi 1                         |
| <i>HBB</i>          | Hemoglobin subunit beta                                |
| <i>HBEGF</i>        | Heparin binding EGF-like growth factor                 |
| <i>HEATR1</i>       | HEAT repeat containing 1                               |
| <i>HMGB1</i>        | High mobility group box 1                              |
| <i>HO-1</i>         | Heme oxygenase-1                                       |
| <i>HPX</i>          | Hemopexin precursor                                    |
| <i>HSP90AB1</i>     | Heat shock protein 90 alpha family class B member 1    |
| <i>HSPA1A</i>       | Heat shock protein family A (Hsp70) member 1A          |
| <i>HSPA8</i>        | Heat shock protein family A (Hsp70) member 8           |
| <i>ICAM-1</i>       | Intercellular adhesion molecule 1                      |
| <i>IL-1B</i>        | Interleukin-1 B                                        |
| <i>IL-1R2</i>       | Interleukin-1 receptor type 2                          |
| <i>IL-10</i>        | Interleukin-10                                         |
| <i>IL-13</i>        | Interleukin-13                                         |
| <i>IL-18</i>        | Interleukin-18                                         |
| <i>IL-6</i>         | Interleukin-6                                          |
| <i>IL-8</i>         | Interleukin-8                                          |
| <i>IRAK1</i>        | Interleukin-1 receptor-associated kinase               |
| <i>JMJD1C</i>       | Jumonji domain containing 1C                           |
| <i>JUN</i>          | AP-1 family transcription factor                       |
| <i>KEAP1</i>        | Kelch-like ECH-associated protein 1                    |
| <i>KL-6</i>         | Krebs von den Lugen-6                                  |
| <i>LCN2</i>         | Lipocalin 2                                            |
| <i>LDH</i>          | Lactate dehydrogenase                                  |
| <i>LGALS3</i>       | S3 galectin 3                                          |
| <i>LRRRC16A</i>     | Leucine rich repeat containing 16A                     |
| <i>MAPK</i>         | Mitogen-activated protein kinase                       |
| <i>MHC-DRB1</i>     | Major histocompatibility complex class II DR B1 domain |
| <i>MIF</i>          | Macrophage migration inhibitory factor                 |
| <i>MMP8</i>         | Matrix metalloproteinase 8                             |
| <i>MMP9</i>         | Matrix metalloproteinase 9                             |
| <i>MYLK</i>         | Encoding myosin light chain kinase                     |
| <i>NAMPT</i>        | Nicotinamide phosphoribosyl transferase                |
| <i>NCF1</i>         | Neutrophil cytosolic factor 1                          |
| <i>NFE2L2</i>       | Nuclear factor erythroid 2 like 2                      |
| <i>NF-κB</i>        | Nuclear factor kappa B                                 |
| <i>NRF2</i>         | Nuclear factor erythroid 2 like 2                      |
| <i>nmMLCK</i>       | Non-muscle myosin light chain kinase                   |
| <i>NOS3</i>         | Nitric oxide synthase 3                                |
| <i>NOX</i>          | NADPH oxidase                                          |
| <i>NQPO1</i>        | NAD(P)H:quinone oxidoreductase 1                       |
| <i>OLFM4</i>        | Olfactomedin 4                                         |
| <i>OSM</i>          | Oncostatin M                                           |
| <i>PA-1</i>         | Pediocin PA-1                                          |
| <i>PBEF</i>         | Nicotinate phosphoribosyltransferase                   |
| <i>PDE4B</i>        | Phosphodiesterase 4B                                   |
| <i>PDX5</i>         | Peroxisome oxidoreductin 5 mitochondrial               |
| <i>PGAM1</i>        | Phosphoglycerate mutase 1                              |
| <i>PHD2</i>         | Egl-9 family hypoxia inducible factor 1                |
| <i>PI3</i>          | Peptidase inhibitor 3                                  |
| <i>PI3K</i>         | Peptidase inhibitor 3 kinase                           |
| <i>PLAUR</i>        | Plasminogen activator, urokinase receptor              |
| <i>POPDC3</i>       | Popeye domain containing 3                             |
| <i>PPFIA1</i>       | PTPRF interacting protein alpha 1                      |
| <i>PPIA</i>         | Peptidylprolyl isomerase A                             |
| <i>PRDX2</i>        | Peroxisome oxidoreductin 2                             |
| <i>PRDX3</i>        | Peroxisome oxidoreductin 3                             |
| <i>PRDX6</i>        | Peroxisome oxidoreductin 6                             |
| <i>PTGS2</i>        | Prostaglandin-endoperoxide synthase 2                  |
| <i>RAGE</i>         | Receptor of advanced glycation end products            |

(continued)

SUPPLEMENTARY TABLE S1. (CONTINUED)

| <i>Abbreviation</i> | <i>Common gene names</i>                                                    |
|---------------------|-----------------------------------------------------------------------------|
| <i>RANKL</i>        | Nuclear factor kappa-B ligand                                               |
| <i>RBP7</i>         | Retinol binding protein 7                                                   |
| <i>RNASE3</i>       | Ribonuclease A family member 3                                              |
| <i>S100A12</i>      | Calgranulin C                                                               |
| <i>S100A8</i>       | Calgranulin A                                                               |
| <i>S100A9</i>       | Calgranulin B                                                               |
| <i>S1P1</i>         | Sphingosine 1-phosphate 1                                                   |
| <i>S1P3</i>         | Sphingosine 1-phosphate 3                                                   |
| <i>S1PR1</i>        | Sphingosine 1-phosphate receptors 1                                         |
| <i>S1PR3</i>        | Sphingosine 1-phosphate receptors 3                                         |
| <i>SAA</i>          | Serum amyloid protein                                                       |
| <i>SELPLG</i>       | Selectin P ligand                                                           |
| <i>SERPINA1</i>     | Alpha-1-antitrypsin                                                         |
| <i>SLMO2</i>        | PRELI domain containing 3B                                                  |
| <i>SOD</i>          | Superoxide dismutase                                                        |
| <i>SOD2</i>         | Superoxide dismutase 2                                                      |
| <i>SOD3</i>         | Superoxide dismutase 3                                                      |
| <i>SP-B</i>         | Surfactant-associated protein B                                             |
| <i>sRAGE</i>        | Soluble receptor for advanced glycation end products                        |
| <i>STAT</i>         | Signal transducer and activator of transcription                            |
| <i>STAT4</i>        | Signal transducer and activator of transcription 4                          |
| <i>STAT5</i>        | Signal transducer and activator of transcription 5                          |
| <i>TGFB2</i>        | Transforming growth factor beta 2                                           |
| <i>TIMP-1</i>       | Tissue inhibitor of metalloproteinases inhibitor 1                          |
| <i>TLR1</i>         | Toll-like receptor 1                                                        |
| <i>TLR4</i>         | Toll-like receptor 4                                                        |
| <i>TNFAIP3</i>      | Tumor necrosis factor alpha-induced protein 3                               |
| <i>TNFR</i>         | Tumor necrosis factor receptor                                              |
| <i>TNFRSF11A</i>    | Tumor necrosis factor receptor superfamily member 11a                       |
| <i>TRAF6</i>        | TNF receptor-associated factor 6                                            |
| <i>TRIF</i>         | TIR-domain containing adaptor-inducing interferon-B                         |
| <i>TXN</i>          | Thioredoxin                                                                 |
| <i>VEGF</i>         | Vascular endothelial growth factor                                          |
| <i>VEGFA</i>        | Vascular endothelial growth factor A                                        |
| <i>vWF</i>          | von Willebrand factor                                                       |
| <i>UGT2B7</i>       | UDP glucuronosyltransferase family 2 member B7                              |
| <i>UTS2</i>         | Urotensin 2                                                                 |
| <i>XKR3</i>         | XK-related 3                                                                |
| <i>YWHAZ</i>        | Tyrosine 3-monooxygenase/tryptophan 5-monooxygenase activation protein zeta |
| <i>ZNF335</i>       | Zinc-Finger/Leucine-Zipper Co-Transducer NIF1                               |

ARE, antioxidant response elements; *DIO2*, iodothyronine deiodinase 2; eNAMPT, extracellular NAMPT; *GADD45a*, growth arrest and DNA damage-inducible gene; HMGB1, high mobility group box 1; ICAM-1, intercellular adhesion molecule 1; *IRAK1*, interleukin-1 receptor associated kinase; KEAP1, Kelch-like ECH associated protein 1; KL-6, Krebs von den Lugen-6; LDH, lactate dehydrogenase; MIF, macrophage migration inhibitory factor; *MYLK*, myosin light chain kinase; NADPH, nicotinamide adenine dinucleotide; NAMPT, nicotinamide phosphoribosyl transferase; *PRDXs*, peroxiredoxin gene family; RANKL, receptor for receptor activator of NF- $\kappa$ B ligand; S1Ps, sphingosine 1-phosphate receptors; TLR4, toll-like receptor 4; vWF, von Willebrand factor; XKR3, XK-related 3.
